# Supplementary material for: Improved energy storage performance in flexible (PbLa)ZrO3 thin films via nanocrystalline engineering
Source: Royal Society of Chemistry journal article supplement (doi:10.1039/d3tc03878e), 2023-01-01
Supplement: d3tc03878e1.pdf [file d3tc03878e1.pdf]

## Supporting Information

### **Improved Energy Storage Performance in Flexible (PbLa)ZrO<sub>3</sub> Thin Films via**

### **Nanocrystalline Engineering**

Chao Yin <sup>a,b</sup>, Tiandong Zhang <sup>a,b\*</sup>, Changhai Zhang <sup>a,b</sup>, Chang Kyu Jeong <sup>c</sup>, Geon-Tae Hwang <sup>d</sup>, Qingguo Chi <sup>a,b\*</sup>

<sup>a</sup> School of Electrical and Electronic Engineering, Harbin University of Science and Technology, Harbin 150080, China

<sup>b</sup> Key Laboratory of Engineering Dielectrics and Its Application, Ministry of Education, Harbin University of Science and Technology, Harbin 150080, China

<sup>c</sup> Division of Advanced Materials Engineering, Jeonbuk National University, Jeonju 54896, Korea

<sup>d</sup> Department of Materials Science and Engineering, Pukyong National University, Busan 48513, Korea

E-mail: [tdzhang@hrbust.edu.cn](mailto:tdzhang@hrbust.edu.cn) and [qgchi@hotmail.com](mailto:qgchi@hotmail.com)

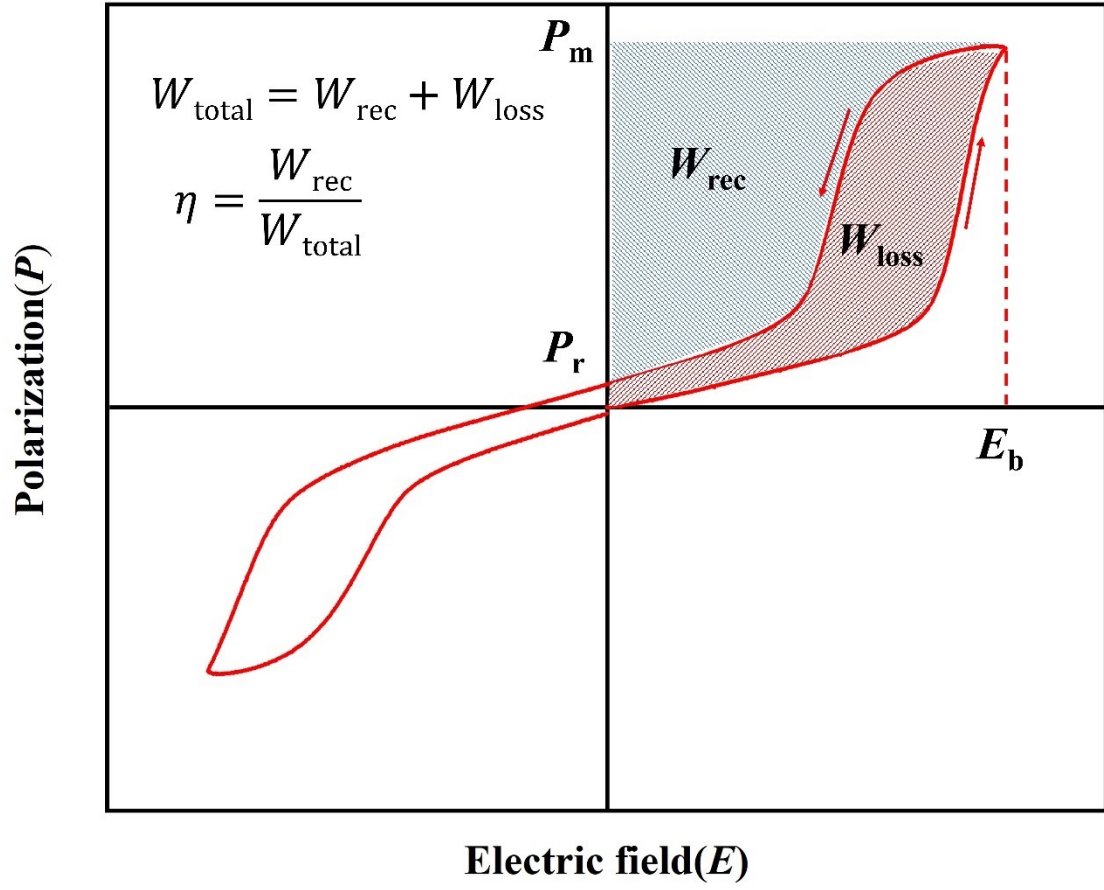

**Figure S1.** Schematic diagram for the energy storage of antiferroelectric dielectric.

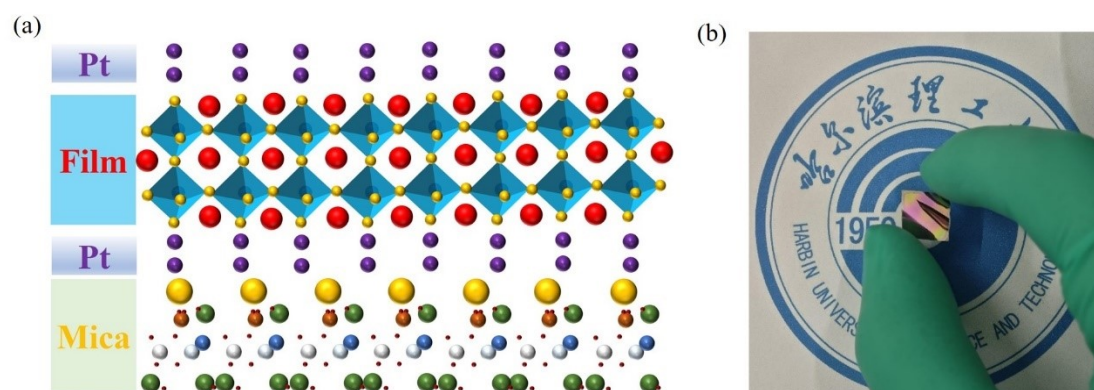

**Figure S2.** (a) The structure diagram of flexible film, (b) The actual photograph of flexible film.

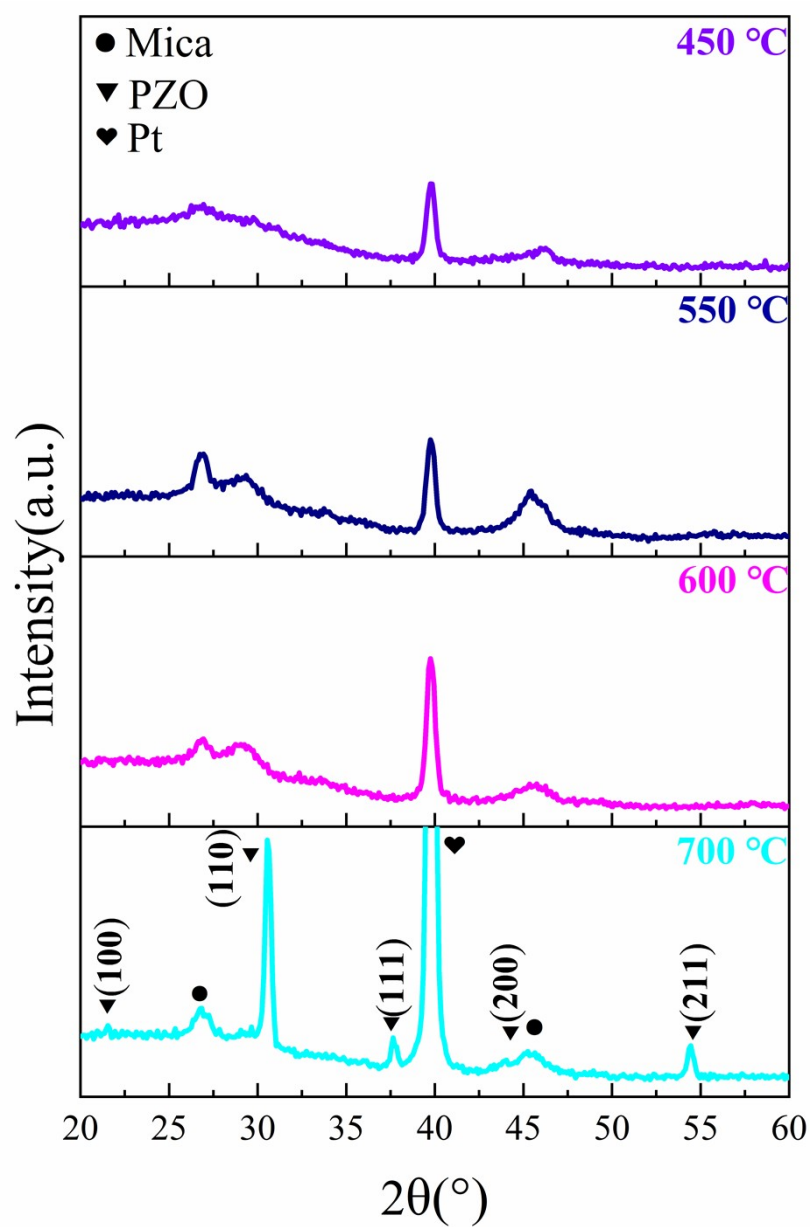

**Figure S3.** The XRD patterns of flexible films.

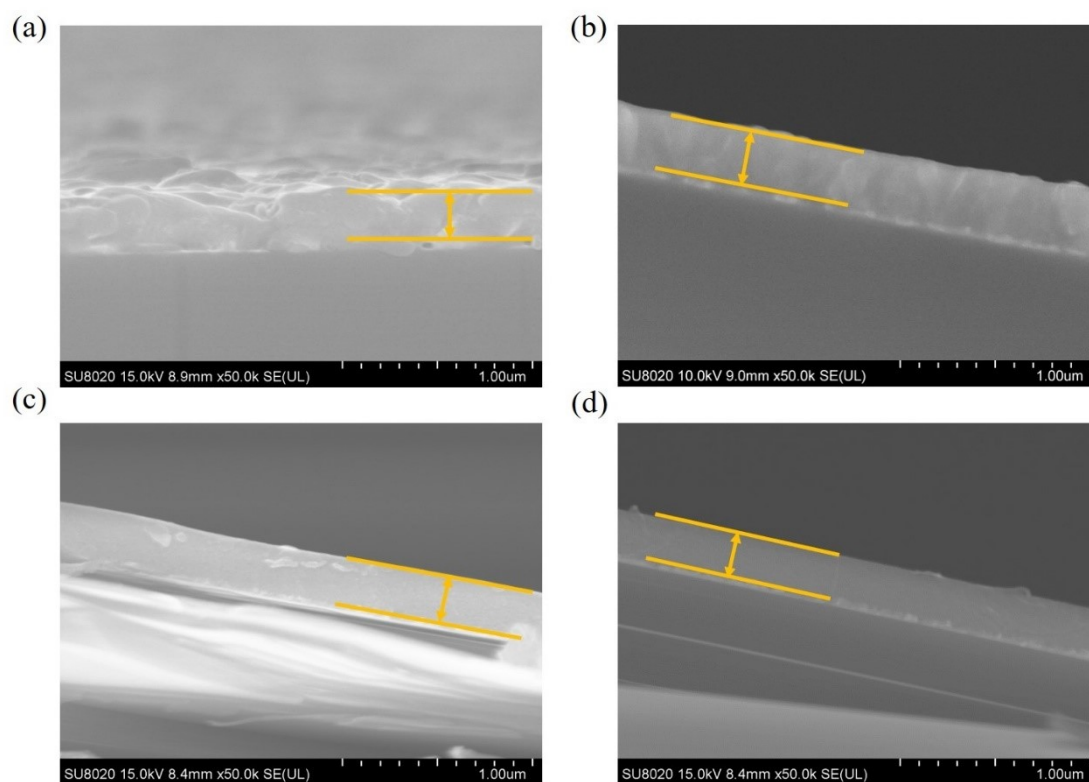

**Figure S4.** The cross-section SEM micrographs of flexible films at different annealed temperatures. (a) 700 °C, (b) 600 °C, (c) 550 °C, (d) 450 °C

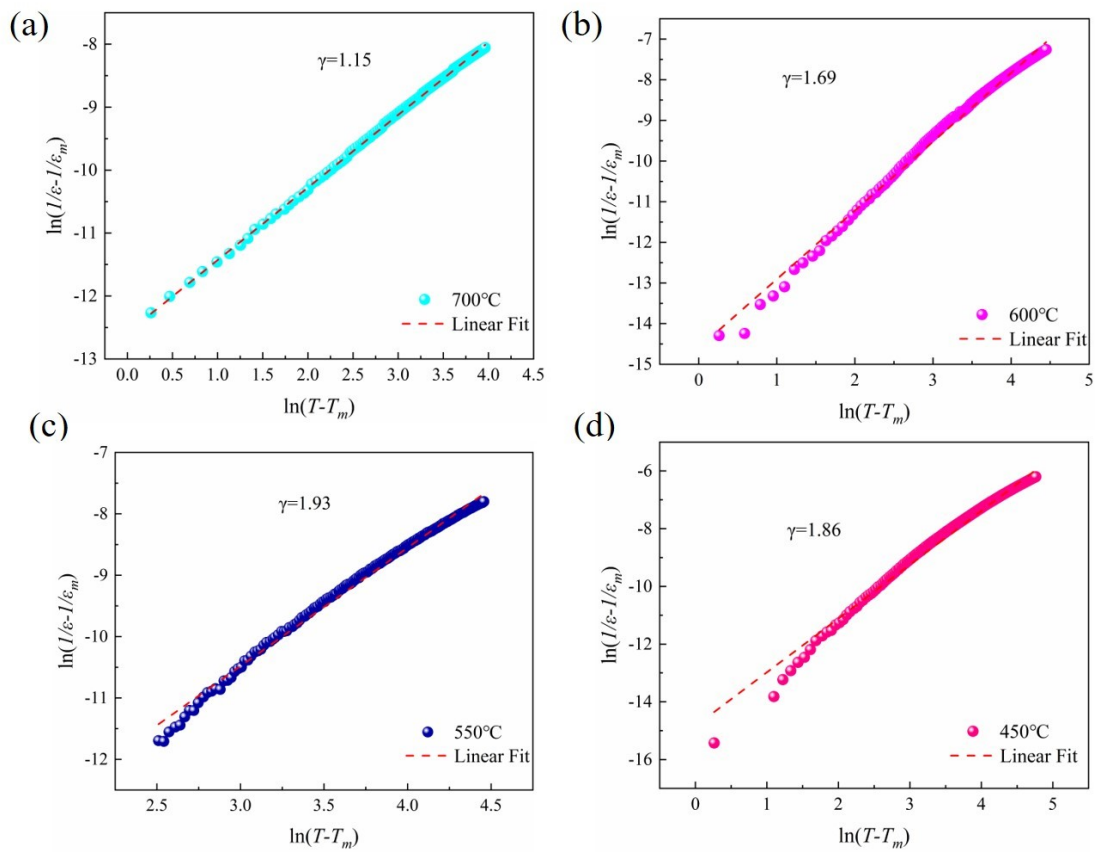

**Figure S5.** The relationship between  $\ln(1/\epsilon - 1/\epsilon_m)$  and  $\ln(T - T_m)$  of flexible films at different annealed temperatures. (a) 700 °C, (b) 600 °C, (c) 550 °C, (d) 450 °C.

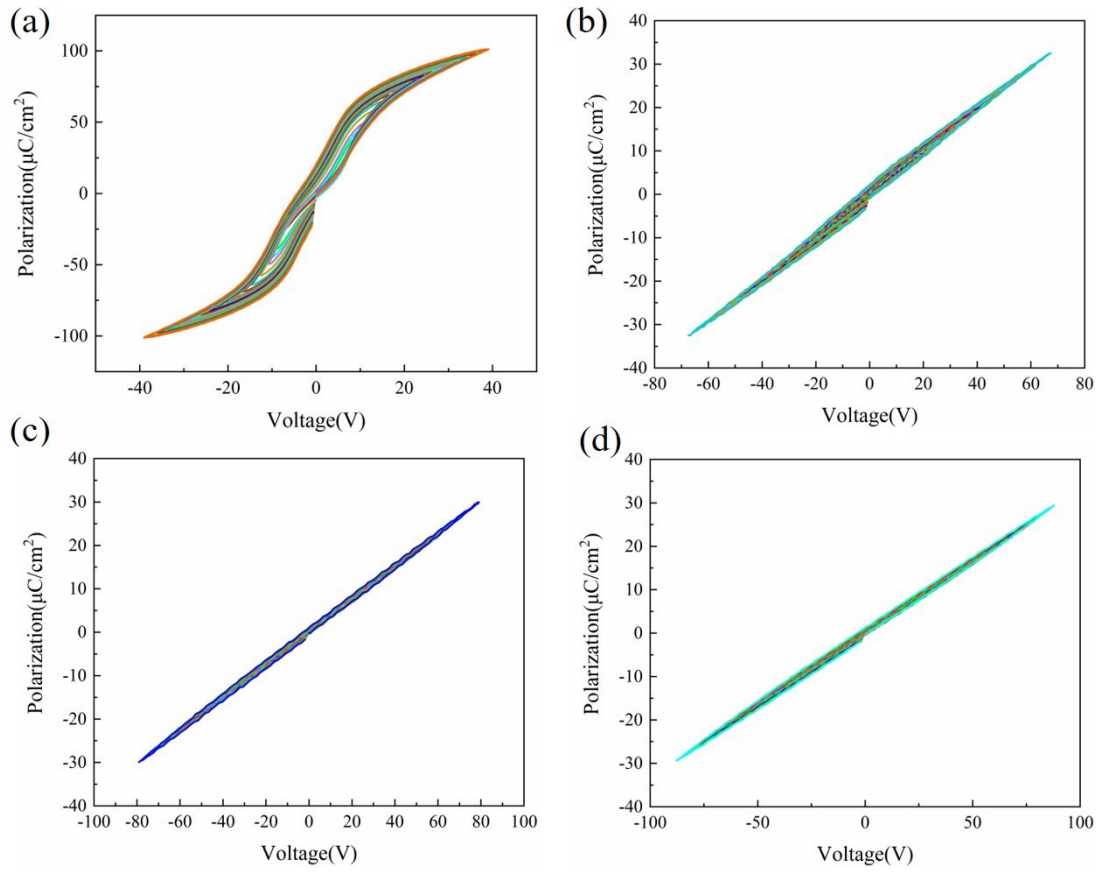

**Figure S6.** The  $P$ - $E$  loops of flexible films at different annealing temperatures. (a)

700 °C, (b) 600 °C, (c) 550 °C, (d) 450 °C.

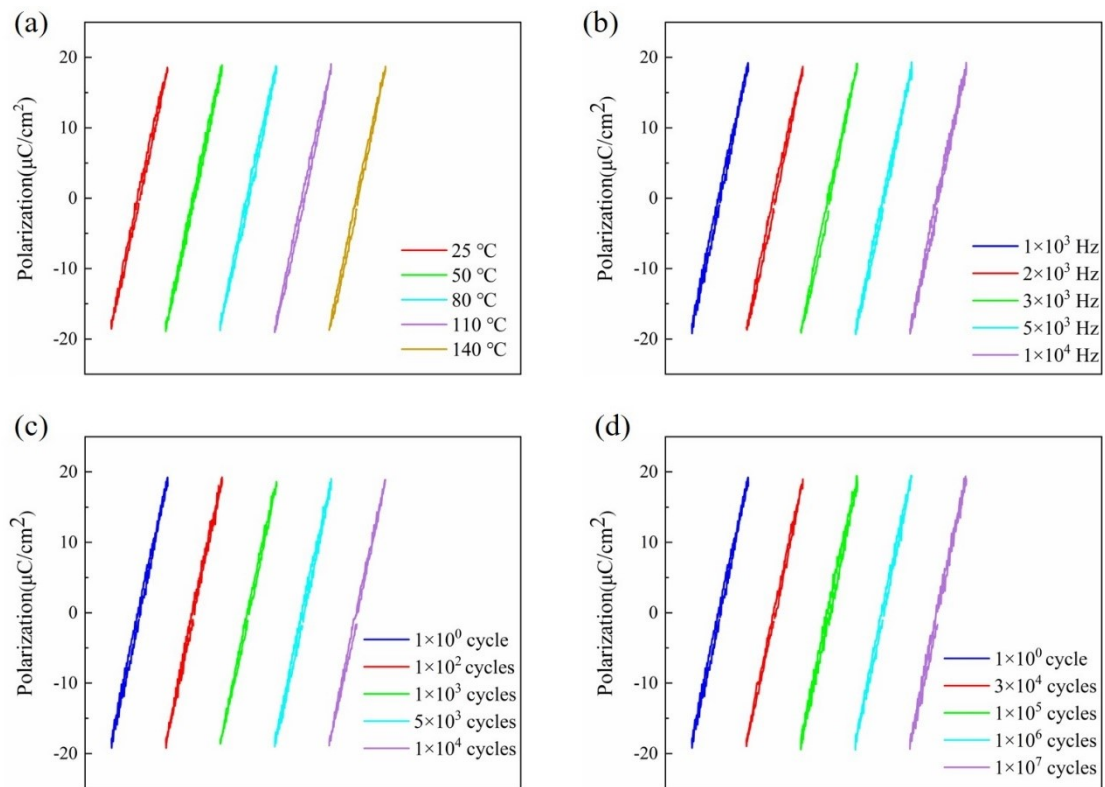

**Figure S7.** The  $P$ - $E$  loops of flexible (PbLa)ZrO<sub>3</sub> films annealed at 550 °C under different test conditions. (a) 25-140 °C, (b) 1 k-10 kHz, (c) 10<sup>4</sup> bending cycles, (d) 10<sup>7</sup> electric fatigue cycles.

### Supplementary Note 1.

The energy storage density ( $W_{\text{rec}}$ ) and charge-discharge efficiency ( $\eta$ ) are two key parameters to evaluate the energy storage performance of dielectric films.  $W_{\text{rec}}$  and  $\eta$  can be expressed by calculating the integral area of the  $P$ - $E$  loop. [1]

$$W_{\text{total}} = \int_0^{P_m} E dP \quad (1)$$

$$W_{\text{rec}} = \int_{P_r}^{P_m} E dP \quad (2)$$

$$\eta = \frac{W_{\text{rec}}}{W_{\text{total}}} \times 100\% \quad (3)$$

Where  $P_m$  and  $P_r$  are the maximum polarization and remanent polarization of the dielectrics under an external electric field, respectively.

### Supplementary Note 2.

The relaxor dispersion degree can be evaluated using the modified Curie-Weiss equation:[2]

$$1/\varepsilon - 1/\varepsilon_m = (T - T_m)^\gamma / C \quad (4)$$

where  $\gamma$  is the relaxor diffuseness factor,  $C$  is Curie constant, and  $\varepsilon_m$  is the maximum dielectric constant at  $T_m$ .  $\gamma = 1$  indicates normal ferroelectric and  $\gamma = 2$  corresponds to classical relaxor ferroelectric.

### Supplementary Note 3.

The breakdown strength values of the thin films are also analyzed by Weibull distribution: [3]

$$X_i = \ln(E_i) \quad (5)$$

$$Y_i = \ln(-\ln(1 - i / (1 + n))) \quad (6)$$

where  $i$  is the serial number of the samples,  $n$  is the number of samples,  $E_i$  is the breakdown strength of each sample,  $X_i$  and  $Y_i$  are two parameters.

## References

- [1] C. Yin, T.D. Zhang, Z.Z. Shi, C.H. Zhang, Y. Feng, Q.G. Chi. High energy storage performance of all-inorganic flexible antiferroelectric–insulator multilayered thin films. *ACS Appl. Mater. Interfaces* 14 (2022) 28997-29006.
- [2] B.B. Yang, Y. Zhang, H. Pan, W.L. Si, Q.H. Zhang, Z.H. Shen, Y. Yu, S. Lan, F.Q. Meng, Y.Q. Liu, H.B. Huang, J.Q. He, L. Gu, S.J. Zhang, L.Q. Chen, J. Zhu, C.W. Nan, Y.H. Lin. High-entropy enhanced capacitive energy storage. *Nat. Mater.* 21 (2022) 1074-1080.
- [3] J. Luo, H. Zhu, T.Y. Zheng, H. Qian, Y.F. Liu, Y.N. Lyu. A slush-like polar structure for high energy storage performance in a  $\text{Sr}_{0.7}\text{Bi}_{0.2}\text{TiO}_3$  lead-free relaxor ferroelectric thin film. *J. Mater. Chem. A* 10 (2022) 7357-7365.
